# Supplementary material for: A rapid and simple single-step method for Mg separation from carbonates for isotopic analysis by MC-ICP-MS
Source: Royal Society of Chemistry journal article supplement (doi:10.1039/d0ja00473a), 2020-12-18
Supplement: d0ja00473a1.xlsx [file d0ja00473a1.xlsx]

## Sheet: Mg isotope by routine method
25/24 Raw	Error	26/24 Raw	Error	Total Beam (V)	Error	Sample Name
0.136232	1.23e-06	0.160979	1.46e-06	7.10651	0.0396	GSB MG
0.136094	1.84e-06	0.160665	2.27e-06	5.94278	0.0226	ALFA MG		-2.03051	0.145268	-3.97267	0.14988
0.136228	1.12e-06	0.160969	2.89e-06	6.72885	0.0535	GSB MG
0.136092	1.19e-06	0.160667	1.92e-06	6.02676	0.0223	ALFA MG		-2.04189	0.107242	-3.96489	0.192528	-2.0362	0.0160975	-3.96878	0.0109979
0.136231	1.84e-06	0.160981	1.36e-06	7.24729	0.0343	GSB MG
0.13622	1.26e-06	0.160952	1.69e-06	6.31364	0.0399	GSB
0.136029	1.44e-06	0.160523	1.91e-06	5.53205	0.0274	GBW07129-01		-2.42261	0.125562	-4.69773	0.141563
0.136218	2.05e-06	0.160946	1.83e-06	6.25002	0.0299	GSB
0.13603	1.98e-06	0.160534	1.22e-06	5.54411	0.0271	GBW07129-01		-2.42033	0.187004	-4.6585	0.122
0.13622	1.65e-06	0.160963	1.63e-06	6.31631	0.0278	GSB
0.136029	1.77e-06	0.16054	2.29e-06	4.51333	0.0182	GBW07129-01		-2.44094	0.158779	-4.67948	0.156054	-2.42796	0.157115	-4.67857	0.139872
0.136222	1.86e-06	0.160964	1.86e-06	6.37733	0.0333	GSB
0.136029	1.51e-06	0.160536	2.08e-06	4.54164	0.0207	GBW07129-02		-2.40971	0.15718	-4.70185	0.154869
0.136211	1.72e-06	0.160963	1.77e-06	6.20571	0.0382	GSB
0.136027	2.01e-06	0.160535	1.66e-06	4.54704	0.0222	GBW07129-02		-2.381	0.173616	-4.69412	0.134653
0.136211	3.1e-06	0.16096	2.45e-06	6.48841	0.0327	GSB
0.136026	1.85e-06	0.160536	1.78e-06	4.54014	0.0263	GBW07129-02		-2.389	0.236817	-4.68047	0.167991	-2.39324	0.189204	-4.69215	0.152504
0.136211	1.25e-06	0.16096	2.04e-06	6.45803	0.0359	GSB
0.13622	1.59e-06	0.160964	1.76e-06	6.81705	0.0362	GSB
0.136183	2.41e-06	0.160913	2.01e-06	7.36255	0.0461	JDO-1		-1.27556	0.189569	-2.40566	0.148427
0.136213	1.91e-06	0.160976	1.96e-06	6.76934	0.0413	GSB
0.136186	2.27e-06	0.160917	1.9e-06	7.35414	0.0351	JDO-1		-1.30308	0.194765	-2.44011	0.151639
0.136233	1.31e-06	0.160984	1.46e-06	6.72404	0.0398	GSB
0.136189	2.31e-06	0.160924	1.94e-06	7.33014	0.0406	JDO-1		-1.27041	0.174355	-2.40408	0.134885	-1.28302	0.18623	-2.41661	0.144983
0.136212	1.59e-06	0.160978	2.84e-06	6.85668	0.0439	GSB
0.136252	2.26e-06	0.161058	2.23e-06	6.65062	0.0362	GBW07130		-0.80316	0.181451	-1.57044	0.200684
0.13623	1.74e-06	0.160984	1.56e-06	6.77486	0.038	GSB
0.136252	1.79e-06	0.161062	1.85e-06	6.61837	0.0475	GBW07130		-0.848318	0.163917	-1.5546	0.134481
0.136224	1.74e-06	0.16098	2.3e-06	6.70672	0.0359	GSB
0.13625	2.78e-06	0.161055	2.01e-06	6.63261	0.0433	GBW07130		-0.857493	0.215343	-1.58939	0.169757	-0.836324	0.186903	-1.57148	0.168307
0.136228	2.04e-06	0.160981	1.8e-06	6.79323	0.0357	GSB
0.136187	2.24e-06	0.160902	1.76e-06	7.00587	0.0334	GBW07135		-1.33941	0.198892	-2.54788	0.139836
0.13623	2.23e-06	0.160984	1.79e-06	6.70723	0.0402	GSB
0.136183	2.43e-06	0.160898	2.17e-06	7.02003	0.0341	GBW07135		-1.35556	0.216514	-2.56621	0.15626
0.136225	1.31e-06	0.16098	1.99e-06	6.75612	0.0358	GSB
0.136183	1.27e-06	0.160903	1.97e-06	7.32074	0.0359	GBW07135		-1.3673	0.119772	-2.53701	0.155543	-1.35409	0.178393	-2.55037	0.150546
0.136234	1.65e-06	0.160982	2.01e-06	6.67154	0.00963	GSB
0.13618	1.55e-06	0.16089	1.09e-06	7.99906	0.00972	GBW07135		-1.3596	0.148614	-2.58424	0.126993
0.136215	1.09e-06	0.16097	1.88e-06	7.08761	0.0127	GSB
0.136176	1.5e-06	0.160893	1.55e-06	7.97624	0.00676	07135-2		-1.31161	0.121741	-2.53456	0.135348
0.136214	1.22e-06	0.160972	1.87e-06	7.04059	0.0128	GSB
0.136172	1.58e-06	0.160885	1.52e-06	7.20954	0.00665	07135-2		-1.3754	0.131055	-2.58488	0.133858	-1.34887	0.133803	-2.56789	0.132066
0.136224	1.33e-06	0.160971	1.56e-06	7.16133	0.00969	GSB
0.136159	1.36e-06	0.160839	1.33e-06	7.50936	0.00973	07132-2		-1.4767	0.124874	-2.8635	0.113854
0.136216	1.54e-06	0.160969	1.85e-06	7.11254	0.0102	GSB
0.136155	1.64e-06	0.160834	1.25e-06	7.44467	0.0141	07132-2		-1.51759	0.147682	-2.89364	0.123988
0.136227	1.34e-06	0.16097	1.97e-06	7.09132	0.00773	GSB
0.136159	1.2e-06	0.160834	1.56e-06	7.45594	0.00877	07132-2		-1.50312	0.118075	-2.88836	0.139556	-1.49914	0.13021	-2.88183	0.1258
0.13622	1.25e-06	0.160967	1.47e-06	7.07301	0.0065	GSB
0.136159	1.3e-06	0.160838	1.72e-06	8.07363	0.00688	07132-1		-1.48815	0.118389	-2.86879	0.125677
0.136223	1.68e-06	0.160972	1.48e-06	7.1035	0.00739	GSB
0.136161	1.65e-06	0.16084	2.02e-06	7.97915	0.0127	07132-1		-1.48917	0.154575	-2.86226	0.139103
0.136224	1.21e-06	0.160969	1.44e-06	6.94757	0.0098	GSB
0.136166	1.3e-06	0.160841	1.67e-06	7.92237	0.00924	07132-1		-1.47081	0.116583	-2.87125	0.122481	-1.48271	0.129849	-2.86743	0.129087
0.136228	1.68e-06	0.160979	1.95e-06	6.86754	0.0158	GSB
0.136165	1.45e-06	0.160844	1.73e-06	7.69754	0.0114	07132-1
0.136235	1.74e-06	0.160977	1.14e-06	7.01179	0.0109	GSB
0.136215	1.68e-06	0.160955	2.25e-06	7.52947	0.0293	GSB
0.136096	1.48e-06	0.160665	1.36e-06	6.56748	0.013	ALFA		-1.87721	0.146948	-3.83749	0.14591
0.136208	1.35e-06	0.16095	1.46e-06	7.8344	0.00888	GSB
0.136102	1.39e-06	0.160667	1.7e-06	6.61936	0.0245	ALFA		-1.86727	0.127181	-3.83838	0.124432
0.136224	1.38e-06	0.160961	1.38e-06	7.84522	0.00536	GSB
0.136091	1.57e-06	0.160667	1.54e-06	6.69879	0.00589	ALFA		-2.00853	0.137186	-3.86474	0.114815
0.136225	1.31e-06	0.160958	1.5e-06	7.85605	0.00986	GSB
0.136094	1.38e-06	0.160665	1.57e-06	6.73725	0.00499	ALFA		-1.96964	0.124879	-3.85081	0.12056
0.136219	1.45e-06	0.160952	1.41e-06	7.89489	0.011	GSB
0.136101	1.18e-06	0.160671	1.76e-06	6.79958	0.00507	ALFA		-1.89552	0.122687	-3.79555	0.125235
0.136218	1.45e-06	0.160952	1.29e-06	7.94271	0.00979	GSB
0.136101	1.07e-06	0.160669	1.63e-06	6.73158	0.00812	ALFA		-1.89625	0.118258	-3.79712	0.115439
0.13622	1.52e-06	0.160948	1.57e-06	7.92313	0.0108	GSB
0.136098	1.55e-06	0.160663	1.05e-06	6.70705	0.00819	ALFA		-1.97218	0.142472	-3.87038	0.104826
0.136232	1.73e-06	0.160963	2.17e-06	7.54463	0.0144	GSB
0.136097	1.28e-06	0.16066	2.02e-06	6.603	0.0292	ALFA		-1.96375	0.141215	-3.87413	0.164587
0.136216	1.53e-06	0.160944	1.88e-06	7.9228	0.00935	GSB
0.136091	1.06e-06	0.160654	1.28e-06	6.79884	0.00507	ALFA		-1.96929	0.122138	-3.87388	0.126235
0.136222	1.17e-06	0.160951	1.69e-06	7.57758	0.00604	GSB
0.136095	1.48e-06	0.160657	2.34e-06	6.62907	0.0314	ALFA		-1.9414	0.123833	-3.83912	0.160313
0.136217	2.09e-06	0.160939	1.5e-06	7.76284	0.0365	GSB
0.136093	1.47e-06	0.160656	1.59e-06	6.77363	0.00393	ALFA		-1.92601	0.16768	-3.79199	0.121384
0.136214	1.35e-06	0.160934	1.12e-06	8.00891	0.00659	GSB
0.13609	1.13e-06	0.160644	1.47e-06	6.73801	0.0048	ALFA		-1.97994	0.115532	-3.9016	0.102635
0.136224	1.57e-06	0.160949	1.58e-06	7.45679	0.00725	GSB
0.136085	1.31e-06	0.160642	1.67e-06	6.7637	0.00433	ALFA		-2.02948	0.134179	-3.9196	0.127651
0.136219	1.76e-06	0.160937	2.25e-06	7.87647	0.0218	GSB
0.136219	1.41e-06	0.16093	2.69e-06	8.64684	0.00887	GSB
0.136169	1.22e-06	0.160823	1.57e-06	6.82512	0.00586	GBW07132		-1.42788	0.122395	-2.77915	0.173002
0.136228	1.21e-06	0.160951	1.26e-06	8.21905	0.00646	GSB
0.136169	1.52e-06	0.160828	1.5e-06	6.83046	0.00488	GBW07132		-1.44659	0.12754	-2.80924	0.10883
0.136223	1.13e-06	0.160949	1.46e-06	8.20924	0.00732	GSB
0.136174	1.72e-06	0.160823	1.18e-06	6.82767	0.00602	GBW07132		-1.41282	0.135107	-2.84124	0.104271	-1.42909	0.128347	-2.80988	0.128701
0.136229	1.61e-06	0.160952	1.51e-06	8.22886	0.00584	GSB
0.13625	1.22e-06	0.161011	1.46e-06	7.12905	0.00474	GBW07130		-0.843542	0.132647	-1.65919	0.116748
0.136219	1.14e-06	0.160945	1.26e-06	8.23009	0.00466	GSB
0.136244	1.66e-06	0.161006	1.84e-06	7.04442	0.00381	GBW07130		-0.8428	0.132234	-1.62592	0.123955
0.136217	9.35e-07	0.16093	1.3e-06	8.58341	0.00786	GSB
0.136249	1.19e-06	0.161007	1.56e-06	7.03044	0.0147	GBW07130		-0.778925	0.099383	-1.55475	0.112886	-0.821756	0.121421	-1.61329	0.117863
0.136212	1.02e-06	0.160925	1.21e-06	8.57885	0.00766	GSB
0.136185	1.51e-06	0.160864	1.44e-06	6.38249	0.00848	GBW07133		-1.22528	0.119649	-2.41446	0.104526
0.136211	1.18e-06	0.160921	1.83e-06	8.5166	0.00722	GSB
0.136185	1.68e-06	0.160866	1.72e-06	6.22861	0.0255	GBW07133		-1.21537	0.134802	-2.37128	0.139569
0.13621	1.57e-06	0.160915	2.01e-06	8.49128	0.0122	GSB
0.136191	8.91e-07	0.160877	1.72e-06	6.02848	0.00717	GBW07133		-1.19078	0.118523	-2.30261	0.147021	-1.21048	0.124324	-2.36278	0.130372
0.136215	1.25e-06	0.160921	1.48e-06	8.43285	0.00598	GSB
0.136183	1.03e-06	0.160852	1.42e-06	8.27856	0.00573	GBW07135		-1.26272	0.106339	-2.5058	0.11397
0.136214	1.25e-06	0.16093	2.75e-06	8.39972	0.0256	GSB
0.13618	9.44e-07	0.160854	1.91e-06	8.36624	0.00563	GBW07135		-1.28071	0.102839	-2.50704	0.186036
0.136215	1.26e-06	0.160924	1.27e-06	7.42622	0.00509	GSB
0.136183	1.14e-06	0.160846	1.31e-06	8.29687	0.0053	GBW07135		-1.26419	0.111559	-2.55085	0.101384	-1.26921	0.106912	-2.52123	0.133797
0.136214	1.01e-06	0.16093	1.77e-06	7.42617	0.00514	GSB
0.13625	1.21e-06	0.161011	1.85e-06	5.73457	0.00593	GBW07130		-0.767546	0.103505	-1.52243	0.142341
0.136214	1.21e-06	0.160922	1.52e-06	7.41081	0.00691	GSB
0.136243	1.75e-06	0.161008	2.23e-06	5.72636	0.00491	GBW07130		-0.795805	0.139717	-1.51651	0.150026
0.136209	1.03e-06	0.160922	1.26e-06	7.43445	0.00568	GSB
0.136249	1.34e-06	0.161008	1.59e-06	5.72079	0.00631	GBW07130		-0.744411	0.110994	-1.51372	0.112782	-0.769254	0.118072	-1.51755	0.13505
0.136211	1.81e-06	0.160922	1.41e-06	7.44344	0.0132	GSB
0.136188	1.78e-06	0.160868	2.03e-06	5.06308	0.00561	GBW07133		-1.20693	0.16668	-2.40606	0.137358
0.136214	1.43e-06	0.160929	1.88e-06	7.43524	0.00746	GSB
0.136188	1.71e-06	0.160878	1.6e-06	5.08057	0.00528	GBW07133		-1.24106	0.146356	-2.41132	0.137172
0.13622	1.29e-06	0.160943	1.46e-06	7.29012	0.00572	GSB
0.136187	1.88e-06	0.160877	1.87e-06	4.96641	0.021	GBW07133		-1.25831	0.149698	-2.44393	0.131829	-1.23543	0.154245	-2.42044	0.135453
0.136217	1.35e-06	0.160939	2.11e-06	7.4165	0.00449	GSB
0.136213	2.22e-06	0.160934	2.74e-06	4.45137	0.0027	GSB
0.13603	8.96e-07	0.160525	2.1e-06	4.57381	0.00301	GBW07129		-2.38031	0.157016	-4.6035	0.191552
0.136214	1.6e-06	0.160938	2.05e-06	4.44522	0.00299	GSB
0.136031	1.91e-06	0.160528	1.5e-06	4.5932	0.00246	GBW07129		-2.36761	0.163518	-4.59701	0.140939
0.136212	1.62e-06	0.160937	2.39e-06	4.34244	0.00337	GSB
0.13603	1.5e-06	0.160528	2.11e-06	4.49148	0.00313	GBW07129		-2.36761	0.144869	-4.59013	0.176932	-2.37184	0.155134	-4.59688	0.169808
0.136213	2.08e-06	0.160936	2.15e-06	4.26461	0.00309	GSB
0.136189	1.64e-06	0.160883	2.03e-06	6.11444	0.00311	GBW07133		-1.23299	0.173902	-2.38926	0.164305
0.13622	1.58e-06	0.160938	1.85e-06	5.16173	0.00576	GSB
0.136192	1.41e-06	0.16089	2.49e-06	6.14449	0.00341	GBW07133		-1.28142	0.139021	-2.39981	0.172368
0.136232	1.62e-06	0.160954	1.7e-06	5.05086	0.00341	GSB
0.136191	1.57e-06	0.16088	1.24e-06	6.04521	0.0037	GBW07133		-1.2983	0.148098	-2.51597	0.116894	-1.2709	0.153674	-2.43501	0.151189
0.136224	1.87e-06	0.160955	1.93e-06	5.06664	0.0059	GSB
											GBW07129	-2.42796	0.157115	-4.67857	0.139872
												-2.39324	0.189204	-4.69215	0.152504
												-2.37184	0.155134	-4.59688	0.169808
												-2.39768	0.167151	-4.65587	0.154061
											GBW07130	-0.836324	0.186903	-1.57148	0.168307
												-0.821756	0.121421	-1.61329	0.117863
												-0.769254	0.118072	-1.51755	0.13505
												-0.809111	0.142132	-1.56744	0.140407
											GBW07132	-1.49914	0.13021	-2.88183	0.1258
												-1.48271	0.129849	-2.86743	0.129087
												-1.42909	0.128347	-2.80988	0.128701
												-1.47031	0.129469	-2.85305	0.127863
											GBW07133	-1.21048	0.124324	-2.36278	0.130372
												-1.23543	0.154245	-2.42044	0.135453
												-1.2709	0.153674	-2.43501	0.151189
												-1.23894	0.144081	-2.40608	0.139005
											GBW07135	-1.35409	0.178393	-2.55037	0.150546
												-1.34887	0.133803	-2.56789	0.132066
												-1.26921	0.106912	-2.52123	0.133797
												-1.32405	0.139703	-2.5465	0.138803

## Sheet: Mg isotope by developed method
	24Mg	StdErr (abs)	25Mg	StdErr (abs)	26Mg	StdErr (abs)	25Mg/24Mg (1)	StdErr (abs)	26Mg/24Mg (2)	StdErr (abs)		δ25Mg		δ26Mg				δ25Mg	2uc	δ26Mg	2uc
GSB Mg	10.1893	0.00983654	1.38732	0.0013398	1.63841	0.0015865	0.136154	9.34378e-07	0.160797	1.11361e-06
JDO-1-1	9.82059	0.00632034	1.33693	0.000862582	1.57874	0.00101828	0.136136	1.36067e-06	0.160759	1.25018e-06		-1.17806	0.00999492	-2.32841	0.00777672			-1.17806	0.108425	-2.32841	0.0931133
GSB Mg	10.0871	0.0100595	1.37344	0.0013711	1.6221	0.00162409	0.136158	9.77221e-07	0.160811	1.44543e-06
JDO-1-1	9.54565	0.0133595	1.29946	0.0018209	1.53441	0.00216131	0.13613	1.04191e-06	0.16075	1.53103e-06		-1.23339	0.00765378	-2.4089	0.0095243			-1.23339	0.0938281	-2.4089	0.117093
GSB Mg	10.0019	0.00737046	1.36185	0.00100487	1.60834	0.00119119	0.136158	1.25278e-06	0.160804	1.26543e-06
JDO-1-1	9.71092	0.00976798	1.32204	0.00133278	1.56114	0.00158364	0.13614	1.23078e-06	0.160763	1.77377e-06		-1.16968	0.00904055	-2.33427	0.0110335			-1.16968	0.115357	-2.33427	0.12118
GSB Mg	10.0209	0.0108162	1.36444	0.00147585	1.61149	0.00175394	0.136159	1.16895e-06	0.160814	1.71125e-06
JDO-1-1	9.73161	0.00607731	1.32486	0.000826906	1.56449	0.00098059	0.13614	1.11574e-06	0.160764	1.39448e-06		-1.16264	0.00819551	-2.33795	0.00867411			-1.16264	0.106146	-2.33795	0.122759	-1.18594	0.105939	-2.35239	0.113536
GSB Mg	9.98265	0.00996548	1.3592	0.00135956	1.60527	0.00161199	0.136157	9.98186e-07	0.160806	1.56292e-06
JDO-1-2	12.6031	0.00732609	1.71575	0.00100077	2.02609	0.00118973	0.136138	1.21737e-06	0.160761	1.45844e-06		-1.17281	0.00894215	-2.3329	0.00907212			-1.17281	0.10341	-2.3329	0.118884
GSB Mg	9.97585	0.0162623	1.3583	0.00222071	1.60417	0.00262641	0.136158	1.38356e-06	0.160806	1.29142e-06
JDO-1-2	12.5667	0.0108076	1.71078	0.00147499	2.02022	0.00175051	0.136135	1.02263e-06	0.16076	1.23995e-06		-1.18923	0.0075119	-2.3191	0.00771304			-1.18923	0.113007	-2.3191	0.0995678
GSB Mg	9.88209	0.0100569	1.34549	0.00137076	1.58902	0.00162433	0.136155	1.33938e-06	0.160799	1.54449e-06
JDO-1-2	12.4737	0.0199887	1.69812	0.00272927	2.00525	0.00322641	0.136137	1.29236e-06	0.160758	1.46415e-06		-1.17101	0.00949309	-2.32544	0.00910776			-1.17101	0.122257	-2.32544	0.118358
GSB Mg	9.91885	0.00856995	1.35052	0.00117537	1.595	0.00138643	0.136157	1.27707e-06	0.160806	1.48869e-06
JDO-1-2	12.4545	0.021737	1.69546	0.00296908	2.00201	0.00351068	0.136133	9.22193e-07	0.160745	2.09602e-06		-1.18883	0.00677423	-2.38366	0.0130394			-1.18883	0.103469	-2.38366	0.142987	-1.18047	0.110536	-2.34027	0.119949
GSB Mg	9.91753	0.0060082	1.35029	0.000818231	1.59467	0.000968998	0.136151	1.0369e-06	0.160792	1.31375e-06
JDO-1-3	10.3109	0.00701047	1.40363	0.000956036	1.65749	0.00112824	0.136131	9.25016e-07	0.160753	1.20212e-06		-1.18811	0.00679502	-2.32733	0.00747804			-1.18811	0.0912745	-2.32733	0.0990376
GSB Mg	10.0521	0.007969	1.36865	0.00108536	1.61641	0.00128905	0.136155	9.5983e-07	0.160803	1.69126e-06
JDO-1-3	10.1904	0.00816094	1.38719	0.00111319	1.63794	0.00132203	0.136128	9.34943e-07	0.160738	1.49865e-06		-1.21665	0.00686813	-2.4127	0.00932351			-1.21665	0.0880147	-2.4127	0.12567
GSB Mg	10.0135	0.00810905	1.36335	0.00110276	1.61007	0.00131147	0.136152	1.3558e-06	0.160791	1.34055e-06
JDO-1-3	10.3015	0.0128179	1.40231	0.0017527	1.65586	0.00207482	0.136126	1.33541e-06	0.160742	1.57788e-06		-1.21763	0.00981008	-2.36029	0.00981623			-1.21763	0.125004	-2.36029	0.115157
GSB Mg	10.0868	0.00664089	1.37334	0.000904399	1.6219	0.00107229	0.136152	1.15085e-06	0.160793	1.32694e-06
JDO-1-3	10.3645	0.013106	1.41079	0.00178087	1.66573	0.0020976	0.136118	1.28817e-06	0.160715	2.66932e-06		-1.19906	0.00946363	-2.377	0.0166091			-1.19906	0.113478	-2.377	0.165834	-1.20537	0.104443	-2.36933	0.126425
GSB Mg	10.0976	0.00966056	1.37459	0.00131609	1.6231	0.00156642	0.13613	1.09344e-06	0.160741	1.59865e-06
GBW07127	8.13124	0.00569957	1.10682	0.000779116	1.30683	0.000921712	0.13612	1.17418e-06	0.160717	1.70558e-06		-1.08791	0.00862609	-2.18112	0.0106123			-1.08791	0.105418	-2.18112	0.130071
GSB Mg	10.1956	0.0050225	1.38788	0.000683005	1.63878	0.000808277	0.136125	1.01933e-06	0.160736	1.37234e-06
GBW07127	8.09221	0.00718847	1.10148	0.000981483	1.30048	0.00116548	0.136115	1.44736e-06	0.160708	1.97676e-06		-1.08508	0.0106334	-2.17369	0.0123004			-1.08508	0.116319	-2.17369	0.133909
GSB Mg	10.1753	0.00701487	1.38505	0.000956313	1.63537	0.0011343	0.136119	1.15399e-06	0.160719	1.45636e-06
GBW07127	8.13291	0.00457436	1.10696	0.000626723	1.30695	0.00073996	0.136109	1.21043e-06	0.160698	1.65844e-06		-1.08798	0.00889313	-2.13788	0.0103202			-1.08798	0.109889	-2.13788	0.12283
GSB Mg	10.1526	0.0059331	1.38191	0.000811354	1.63159	0.000960771	0.136114	1.00028e-06	0.160706	1.46677e-06
GBW07127	8.1182	0.00420163	1.1049	0.000571637	1.30447	0.000677044	0.136101	1.01983e-06	0.160685	1.03944e-06		-1.10914	0.0074932	-2.14478	0.00646882			-1.10914	0.0938672	-2.14478	0.100052	-1.09253	0.106373	-2.15937	0.121716
GSB Mg	10.1209	0.0104197	1.37755	0.00142373	1.62637	0.0016865	0.13611	1.04661e-06	0.160695	1.53131e-06
GBW07127	9.66859	0.00904639	1.31586	0.00123913	1.55346	0.00146374	0.136097	1.17213e-06	0.16067	1.70794e-06		-1.11784	0.00861244	-2.20364	0.0106301			-1.11784	0.103258	-2.20364	0.12767
GSB Mg	10.2359	0.00485622	1.39319	0.000667386	1.64486	0.000788657	0.136109	1.19609e-06	0.160695	1.43601e-06
GBW07127	9.68072	0.00583251	1.31745	0.000797015	1.55523	0.000944294	0.13609	1.75816e-06	0.160656	1.36311e-06		-1.14972	0.0129191	-2.24919	0.00848461			-1.14972	0.139735	-2.24919	0.110197
GSB Mg	10.2325	0.00656298	1.39267	0.000896682	1.64418	0.00106351	0.136103	1.23249e-06	0.160681	1.32216e-06
GBW07127	9.76925	0.005113	1.32949	0.000698325	1.56949	0.000824879	0.13609	1.23516e-06	0.160656	1.3889e-06		-1.10653	0.00907609	-2.15373	0.00864517			-1.10653	0.114667	-2.15373	0.106742
GSB Mg	10.2528	0.00720419	1.39538	0.000982705	1.64727	0.00115969	0.136097	1.25254e-06	0.160665	1.60901e-06
GBW07127	9.7585	0.0145951	1.328	0.001993	1.56764	0.00236162	0.136086	1.39077e-06	0.160645	1.66989e-06		-1.10616	0.0102198	-2.17579	0.0103949			-1.10616	0.123001	-2.17579	0.129088	-1.12007	0.120165	-2.19559	0.118424
GSB Mg	10.2619	0.00739539	1.39662	0.00100855	1.64873	0.00119343	0.136097	1.20048e-06	0.160666	1.21795e-06
GBW07127	9.34698	0.0106217	1.27196	0.0014473	1.50146	0.00171385	0.136082	1.009e-06	0.160636	1.34341e-06		-1.12357	0.00741465	-2.19839	0.00836307			-1.12357	0.103058	-2.19839	0.100945
GSB Mg	10.2202	0.00676448	1.39091	0.000921039	1.6419	0.00109424	0.136093	1.2183e-06	0.160653	1.28765e-06
GBW07127	9.437	0.00585749	1.28424	0.000795084	1.516	0.000946492	0.136085	1.15934e-06	0.160636	1.20813e-06		-1.07956	0.00851924	-2.17058	0.00752093			-1.07956	0.110526	-2.17058	0.0982957
GSB Mg	10.2765	0.00666837	1.39854	0.000912063	1.651	0.0010769	0.136092	1.30503e-06	0.160658	1.40836e-06
GBW07127	9.28736	0.00872418	1.2638	0.0011907	1.49175	0.00140484	0.136078	1.19837e-06	0.160621	1.36103e-06		-1.11114	0.00880653	-2.24189	0.00847356			-1.11114	0.116443	-2.24189	0.109031
GSB Mg	10.2557	0.00876281	1.39566	0.00119308	1.64754	0.00141123	0.136086	1.18189e-06	0.160647	1.3275e-06
GBW07127	9.33121	0.00898687	1.26977	0.00122205	1.49874	0.00145037	0.136079	1.26623e-06	0.160615	1.33306e-06		-1.09476	0.00930515	-2.2536	0.00829973			-1.09476	0.113839	-2.2536	0.104733	-1.10226	0.110966	-2.21612	0.103251
GSB Mg	10.3346	0.00823299	1.40641	0.00112273	1.66023	0.00133237	0.136089	9.73287e-07	0.160649	1.55403e-06
GSB Mg	9.96357	0.00637105	1.35592	0.000866193	1.60061	0.00102518	0.136089	1.02883e-06	0.160646	1.04324e-06
GBW07128	11.3242	0.010257	1.54097	0.00140008	1.81894	0.00165823	0.136078	1.10795e-06	0.160624	1.40903e-06		-1.09275	0.00814201	-2.17438	0.00877222			-1.09275	0.0993709	-2.17438	0.0976098
GSB Mg	9.9248	0.0107411	1.35061	0.00146668	1.59433	0.00174083	0.136084	1.38014e-06	0.160643	1.48494e-06
GBW07128	11.3152	0.00951819	1.53972	0.0013003	1.81739	0.00153682	0.136075	1.07404e-06	0.160615	1.23548e-06		-1.06953	0.00789299	-2.17594	0.00769222			-1.06953	0.114942	-2.17594	0.10755
GSB Mg	9.82805	0.00879704	1.33738	0.00119998	1.57865	0.00142005	0.136077	1.10957e-06	0.160627	1.55791e-06
GBW07128	11.33	0.00982229	1.54166	0.00134401	1.8197	0.00158548	0.136069	1.2724e-06	0.160609	1.18186e-06		-1.09131	0.00935113	-2.15888	0.00735861			-1.09131	0.110964	-2.15888	0.108881	-1.08453	0.108426	-2.16973	0.10468
GSB Mg	9.85691	0.00903216	1.34132	0.00123444	1.58326	0.00145841	0.136078	1.05468e-06	0.160625	1.37769e-06
GBW07128	7.83017	0.00591144	1.06547	0.000806317	1.25761	0.000953874	0.136072	1.26085e-06	0.160612	1.6725e-06		-1.06016	0.00926608	-2.09548	0.0104133			-1.06016	0.108046	-2.09548	0.120662
GSB Mg	9.84312	0.0101333	1.3394	0.00138356	1.58093	0.00163578	0.136074	1.41073e-06	0.160613	1.42482e-06
GBW07128	7.75385	0.0123725	1.055	0.00168539	1.24519	0.00199755	0.136062	1.08766e-06	0.160591	1.7711e-06		-1.10074	0.00799388	-2.15492	0.0110286			-1.10074	0.117086	-2.15492	0.126583
GSB Mg	9.85053	0.0174656	1.34037	0.00238143	1.58202	0.00282221	0.136069	9.918e-07	0.160603	1.85884e-06
GBW07128	7.7454	0.0123808	1.05384	0.00168681	1.24372	0.00199805	0.13606	1.09204e-06	0.160586	1.72935e-06		-1.10481	0.00802613	-2.16415	0.010769			-1.10481	0.0969656	-2.16415	0.141385
GSB Mg	9.93719	0.0121222	1.35216	0.00165676	1.59597	0.00195916	0.136071	1.3911e-06	0.160607	1.72517e-06
GBW07128	7.84636	0.00881057	1.06758	0.00120227	1.26004	0.00142485	0.136061	1.2412e-06	0.160588	1.99739e-06		-1.09877	0.00912243	-2.13808	0.012438			-1.09877	0.122543	-2.13808	0.146981	-1.09112	0.11116	-2.13816	0.133903
GSB Mg	9.92007	0.00870718	1.34982	0.00118766	1.59315	0.0014021	0.136069	1.07984e-06	0.160598	1.45614e-06
GBW07128	10.0377	0.0127544	1.3657	0.00174199	1.61184	0.00205632	0.136058	1.13384e-06	0.160578	1.55928e-06		-1.10197	0.00833349	-2.15415	0.0097104			-1.10197	0.102921	-2.15415	0.118817
GSB Mg	9.97233	0.00872252	1.35689	0.00119138	1.60148	0.00141116	0.136066	1.24807e-06	0.160592	1.51086e-06
GBW07128	10.0808	0.0118032	1.37155	0.00160688	1.61868	0.00190886	0.136056	1.02208e-06	0.160571	1.70987e-06		-1.09562	0.00751216	-2.1832	0.0106487			-1.09562	0.106038	-2.1832	0.127076
GSB Mg	9.95428	0.0117472	1.35443	0.00160026	1.59856	0.00189368	0.136065	9.92102e-07	0.160592	1.4803e-06
GBW07128	9.92253	0.0149772	1.34995	0.00204321	1.59304	0.00241576	0.136048	1.15355e-06	0.160552	1.58561e-06		-1.13535	0.00847901	-2.25202	0.00987601			-1.13535	0.100013	-2.25202	0.12081
GSB Mg	9.93509	0.0131271	1.35177	0.00178945	1.59534	0.00211876	0.13606	1.19803e-06	0.160576	1.68561e-06
GBW07128	10.184	0.00954928	1.38557	0.00130425	1.63526	0.00154343	0.136051	1.17918e-06	0.160562	1.72875e-06		-1.09667	0.00866724	-2.15179	0.0107669			-1.09667	0.110501	-2.15179	0.134482	-1.1074	0.104868	-2.18529	0.125296
GSB Mg	9.97911	0.0115303	1.35776	0.0015722	1.60244	0.00186419	0.13606	1.1625e-06	0.16058	1.67789e-06
GBW07130	9.9645	0.00680599	1.35612	0.000927977	1.60095	0.00109827	0.136095	1.11074e-06	0.160665	1.42276e-06		-0.798813	0.00816153	-1.54349	0.00885545			-0.798813	0.105706	-1.54349	0.122567
GSB Mg	10.0815	0.0102735	1.37176	0.00140016	1.61896	0.00165855	0.136067	1.0297e-06	0.160587	1.50199e-06
GBW07130	9.9708	0.00839287	1.35695	0.0011444	1.60188	0.0013568	0.136092	1.23783e-06	0.160657	1.84204e-06		-0.822834	0.00909554	-1.5935	0.0114657			-0.822834	0.105852	-1.5935	0.132407
GSB Mg	10.0564	0.00897348	1.36828	0.00122448	1.61487	0.00145291	0.13606	1.06286e-06	0.160582	1.92411e-06
GBW07130	9.9862	0.0101463	1.35903	0.00138723	1.60432	0.00163917	0.13609	1.12073e-06	0.160653	1.2726e-06		-0.773281	0.0082352	-1.53221	0.00792143			-0.773281	0.101552	-1.53221	0.128547
GSB Mg	9.9175	0.014861	1.34928	0.00202892	1.59232	0.00240089	0.136051	1.15199e-06	0.160558	1.58576e-06
GBW07130	9.97225	0.012156	1.35711	0.00166007	1.60205	0.00196444	0.136089	1.33008e-06	0.160652	1.80347e-06		-0.754873	0.00977358	-1.47495	0.011226			-0.754873	0.115693	-1.47495	0.133813	-0.78745	0.107201	-1.53604	0.129334
GSB Mg	9.90704	0.0188192	1.3478	0.00256659	1.59055	0.00304235	0.136052	1.17446e-06	0.16056	2.14073e-06
GBW07130	10.0423	0.0107274	1.36661	0.00146739	1.61316	0.00173185	0.136087	1.0511e-06	0.160638	1.57533e-06		-0.757637	0.00772378	-1.53185	0.0098067			-0.757637	0.103634	-1.53185	0.148117
GSB Mg	9.94891	0.0106138	1.35353	0.00144415	1.5973	0.00171494	0.136048	1.17417e-06	0.160549	1.54639e-06
GBW07130	10.0978	0.0111981	1.37416	0.00152441	1.62204	0.00180861	0.136085	8.9221e-07	0.160634	1.7556e-06		-0.771385	0.00655628	-1.54906	0.0109292			-0.771385	0.0969663	-1.54906	0.130362
GSB Mg	10.0815	0.00885788	1.3716	0.00120624	1.61866	0.00143085	0.136051	1.00437e-06	0.160558	1.51648e-06
GBW07130	10.1765	0.0106648	1.38491	0.00145614	1.63482	0.00171991	0.13609	9.75521e-07	0.160647	1.29785e-06		-0.741175	0.0071682	-1.50249	0.00807892			-0.741175	0.0920622	-1.50249	0.111228
GSB Mg	10.1304	0.00978225	1.37824	0.00133422	1.62654	0.0015797	0.13605	1.09117e-06	0.16056	1.49064e-06
GBW07130	10.0134	0.00933522	1.36259	0.00127307	1.60841	0.00150838	0.136077	9.31388e-07	0.160626	1.68678e-06		-0.826688	0.00684456	-1.61593	0.0105012			-0.826688	0.0943269	-1.61593	0.125425	-0.774221	0.0967475	-1.54983	0.128783
GSB Mg	10.0794	0.00861962	1.37128	0.00117426	1.61828	0.00138583	0.136049	1.14842e-06	0.160554	1.48135e-06
GBW07130	8.34523	0.00521434	1.13562	0.000709495	1.34048	0.000842599	0.136081	1.32723e-06	0.16063	1.80198e-06		-0.75942	0.00975322	-1.51924	0.0112182			-0.75942	0.115403	-1.51924	0.129988
GSB Mg	10.2153	0.0120492	1.3897	0.00164464	1.63992	0.00194514	0.13604	1.38788e-06	0.160535	1.40923e-06
GBW07130	8.34789	0.00634528	1.13592	0.000865093	1.34078	0.00102353	0.136078	1.21638e-06	0.160624	1.82981e-06		-0.764355	0.00893883	-1.51082	0.0113919			-0.764355	0.121352	-1.51082	0.128703
GSB Mg	10.3618	0.00764387	1.40966	0.001041	1.66346	0.00123179	0.136044	7.68672e-07	0.160539	1.4047e-06
GBW07130	8.48363	0.00609869	1.1544	0.000832354	1.36259	0.000984332	0.136074	1.03889e-06	0.160614	1.22749e-06		-0.793417	0.00763476	-1.54552	0.00764251			-0.793417	0.0849743	-1.54552	0.103966
GSB Mg	10.3304	0.00792213	1.40533	0.00107708	1.65829	0.00127412	0.136039	9.4015e-07	0.160527	1.34046e-06
GBW07130	8.44013	0.0110157	1.14847	0.00150575	1.35556	0.00178452	0.136073	1.29132e-06	0.16061	1.17568e-06		-0.743928	0.0094899	-1.44429	0.00732007			-0.743928	0.105034	-1.44429	0.0993876	-0.76528	0.106691	-1.50497	0.115511
GSB Mg	10.2434	0.0182356	1.39341	0.00248512	1.64408	0.00294486	0.136029	1.27345e-06	0.160499	2.00749e-06
GSB Mg	9.29759	0.0191591	1.26517	0.00261298	1.49332	0.00309026	0.136075	1.41642e-06	0.160613	1.91205e-06
GBW07131	8.59932	0.00954468	1.17044	0.00129953	1.3818	0.00153591	0.136107	1.0996e-06	0.160687	1.44562e-06		-0.851023	0.00807896	-1.68878	0.0089965			-0.851023	0.117871	-1.68878	0.133504
GSB Mg	9.39051	0.0147545	1.27795	0.00201442	1.50853	0.00238056	0.136091	1.40756e-06	0.160644	1.48205e-06
GBW07131	8.39151	0.016101	1.14211	0.00219689	1.34836	0.00259914	0.136103	1.31213e-06	0.160682	2.00298e-06		-0.907455	0.00964071	-1.7922	0.0124655			-0.907455	0.126483	-1.7922	0.138746
GSB Mg	9.15214	0.0101658	1.24545	0.00138615	1.47016	0.00163922	0.136082	1.3624e-06	0.160636	1.51931e-06
GBW07131	8.53132	0.0135471	1.16121	0.00184787	1.37102	0.00218194	0.136112	1.36307e-06	0.160705	1.28527e-06		-0.845872	0.0100144	-1.66959	0.0079977			-0.845872	0.126677	-1.66959	0.110825
GSB Mg	9.28029	0.011404	1.26296	0.00155712	1.49089	0.00184359	0.136091	1.14784e-06	0.160651	1.78088e-06
GBW07131	8.26679	0.0157481	1.12517	0.00214725	1.32833	0.0025429	0.136117	1.34167e-06	0.160703	1.85704e-06		-0.852026	0.00985672	-1.75492	0.0115557			-0.852026	0.116052	-1.75492	0.143266	-0.864094	0.121771	-1.72637	0.131585
GSB Mg	9.26049	0.0159338	1.2603	0.00217273	1.48778	0.00257698	0.136094	1.2001e-06	0.16066	2.14721e-06
GBW07131	8.48808	0.00869501	1.15542	0.00118645	1.36427	0.00140738	0.136123	7.86794e-07	0.160729	1.47188e-06		-0.849341	0.00578004	-1.68607	0.00915753			-0.849341	0.0943208	-1.68607	0.144955
GSB Mg	9.29004	0.0134742	1.26439	0.00183786	1.49272	0.00217959	0.136102	1.31477e-06	0.16068	1.96936e-06
GBW07131	8.39914	0.0117881	1.14333	0.00161171	1.34999	0.00190677	0.136125	1.44041e-06	0.16073	1.70889e-06		-0.867051	0.0105815	-1.74796	0.010632			-0.867051	0.128173	-1.74796	0.145166
GSB Mg	9.2431	0.0108346	1.25804	0.0014758	1.4852	0.00174646	0.136104	1.00017e-06	0.160683	1.33734e-06
GBW07131	8.29637	0.0123107	1.12932	0.00167924	1.33338	0.00198715	0.136121	1.35852e-06	0.160718	1.40956e-06		-0.878379	0.00998022	-1.76731	0.00877037			-0.878379	0.110871	-1.76731	0.108178
GSB Mg	9.02188	0.0138984	1.22784	0.00189774	1.44947	0.00224426	0.136097	1.26942e-06	0.160662	1.91038e-06
GBW07131	8.47999	0.00710372	1.15439	0.000967938	1.36312	0.00114678	0.136132	1.21141e-06	0.160745	1.62781e-06		-0.834218	0.00889877	-1.66354	0.0101266			-0.834218	0.115323	-1.66354	0.139739	-0.857247	0.112172	-1.71622	0.13451
GSB Mg	9.34259	0.00628888	1.27166	0.00085714	1.50139	0.00101506	0.136114	1.21781e-06	0.160704	1.13832e-06
GBW07131	9.35721	0.0158581	1.27383	0.00216608	1.50414	0.00255946	0.136134	1.45598e-06	0.160755	1.43152e-06		-0.860769	0.0106951	-1.68413	0.00890501			-0.860769	0.124741	-1.68413	0.101813
GSB Mg	9.1081	0.0143545	1.23969	0.00195998	1.46355	0.00231891	0.136109	1.26384e-06	0.160688	1.68145e-06
GBW07131	9.36707	0.0137982	1.27518	0.0018817	1.50576	0.00223127	0.136133	1.19803e-06	0.160752	1.73032e-06		-0.856691	0.00880045	-1.67392	0.0107639			-0.856691	0.114446	-1.67392	0.13432
GSB Mg	9.12122	0.0123436	1.24149	0.00168429	1.46573	0.0019965	0.13611	1.14396e-06	0.160694	1.78291e-06
GBW07131	9.4063	0.0100491	1.28053	0.00137219	1.51213	0.00162544	0.136136	1.22374e-06	0.160757	1.33442e-06		-0.813556	0.00898911	-1.61537	0.00830083			-0.813556	0.110095	-1.61537	0.123994
GSB Mg	9.27753	0.0111992	1.26271	0.00152892	1.49071	0.00181095	0.136104	1.21229e-06	0.160681	1.43328e-06
GBW07131	9.43139	0.0100109	1.28382	0.00136729	1.5159	0.00161809	0.136132	1.4119e-06	0.160749	1.497e-06		-0.832703	0.0103715	-1.64864	0.00931263			-0.832703	0.122304	-1.64864	0.115385	-0.84093	0.117897	-1.65551	0.118878
GSB Mg	9.34506	0.00781665	1.27193	0.00106501	1.50165	0.00126329	0.136107	1.13835e-06	0.160689	1.2657e-06
GBW07132	8.16582	0.00581098	1.11101	0.000790532	1.31122	0.000938607	0.136056	1.34427e-06	0.160572	1.48406e-06		-1.40779	0.0098803	-2.77905	0.00924233			-1.40779	0.115739	-2.77905	0.108535
GSB Mg	9.39439	0.0108714	1.27865	0.00148371	1.50958	0.00175823	0.136107	1.12709e-06	0.160689	1.78816e-06
GBW07132	8.07393	0.0134714	1.09848	0.00183546	1.29637	0.00217478	0.136054	1.64326e-06	0.160563	1.82313e-06		-1.42186	0.012078	-2.82827	0.0113546			-1.42186	0.13093	-2.82827	0.14209
GSB Mg	9.40958	0.0100402	1.28071	0.00137108	1.51199	0.00162069	0.136107	1.14996e-06	0.160687	1.52181e-06
GBW07132	8.08104	0.00713726	1.09942	0.000974655	1.29751	0.00114977	0.136051	1.22176e-06	0.16056	1.5933e-06		-1.39187	0.00898022	-2.73128	0.00992335			-1.39187	0.110246	-2.73128	0.122615
GSB Mg	9.10445	0.0163367	1.23905	0.00222955	1.46266	0.00263776	0.136093	1.45461e-06	0.160653	1.99184e-06
GBW07132	8.06018	0.0130918	1.09658	0.00178537	1.29412	0.00211038	0.136049	1.21783e-06	0.160559	1.37605e-06		-1.39196	0.00895138	-2.73044	0.00857041			-1.39196	0.124649	-2.73044	0.13471	-1.40337	0.120391	-2.76726	0.126987
GSB Mg	9.43313	0.0129613	1.28388	0.00177157	1.51573	0.00209503	0.136104	1.32118e-06	0.160682	1.79848e-06
GBW07132	9.8381	0.00801141	1.33839	0.00109146	1.57947	0.00129412	0.136042	1.34125e-06	0.160547	1.33893e-06		-1.47474	0.00985911	-2.85846	0.00833984			-1.47474	0.123697	-2.85846	0.124748
GSB Mg	9.38491	0.00770346	1.27729	0.00105056	1.50792	0.00124253	0.136101	1.22183e-06	0.16067	1.35709e-06
GBW07132	9.82335	0.0163893	1.3364	0.00223825	1.57708	0.00264781	0.136043	1.43094e-06	0.160543	1.93769e-06		-1.45398	0.0105183	-2.84288	0.0120696			-1.45398	0.123634	-2.84288	0.131658
GSB Mg	9.34006	0.008976	1.27116	0.00122255	1.50067	0.00144989	0.136099	1.16548e-06	0.16067	1.4423e-06
GBW07132	9.97595	0.0100808	1.35724	0.00137602	1.60176	0.00162944	0.136051	1.30573e-06	0.160563	1.16832e-06		-1.40458	0.00959735	-2.76787	0.00727641			-1.40458	0.115001	-2.76787	0.103278
GSB Mg	9.42123	0.0143754	1.28224	0.00196378	1.5138	0.00232458	0.136104	1.21896e-06	0.160686	1.88703e-06
GBW07132	9.9216	0.0106135	1.34984	0.00144943	1.59305	0.00171554	0.136051	1.47215e-06	0.160564	1.71787e-06		-1.40312	0.0108206	-2.78341	0.010699			-1.40312	0.125587	-2.78341	0.141991	-1.4341	0.12198	-2.81315	0.125419
GSB Mg	9.39494	0.00904523	1.27864	0.00123477	1.50955	0.00145705	0.136099	1.18621e-06	0.160677	1.2931e-06
GBW07132	9.51776	0.019478	1.29481	0.00265218	1.52802	0.00313846	0.136043	1.02114e-06	0.160545	1.96117e-06		-1.4556	0.00750602	-2.86545	0.0122157			-1.4556	0.102836	-2.86545	0.130734
GSB Mg	9.47669	0.0119422	1.28979	0.00163162	1.52267	0.00193117	0.136102	1.35713e-06	0.160676	1.78003e-06
GBW07132	9.72913	0.010072	1.32367	0.00137418	1.56215	0.00162817	0.136053	1.02426e-06	0.160564	1.96323e-06		-1.39448	0.00752838	-2.77329	0.0122271			-1.39448	0.111711	-2.77329	0.147468
GSB Mg	9.91194	0.011394	1.34904	0.00155299	1.59268	0.00183736	0.136103	9.1038e-07	0.160684	1.40135e-06
GBW07132	9.76199	0.00965028	1.3282	0.00131794	1.56755	0.00155692	0.13605	1.36232e-06	0.16056	1.60052e-06		-1.42054	0.0100133	-2.79708	0.00996831			-1.42054	0.107664	-2.79708	0.118378
GSB Mg	9.81069	0.015752	1.33527	0.00214794	1.57634	0.00254453	0.136104	1.14089e-06	0.160677	1.86981e-06
GBW07132	9.63774	0.0110955	1.31121	0.00151404	1.54747	0.00178859	0.13605	1.32553e-06	0.160564	1.4387e-06		-1.42952	0.00974301	-2.7762	0.00896027			-1.42952	0.114912	-2.7762	0.131267	-1.42503	0.109281	-2.80301	0.131962
GSB Mg	9.9534	0.00711191	1.3547	0.000966338	1.59937	0.00114601	0.136104	1.1552e-06	0.160684	1.27248e-06
GSB Mg	10.0576	0.0104246	1.36884	0.00142228	1.61602	0.00167992	0.1361	1.37951e-06	0.160677	1.20757e-06
GBW07133	19.3578	0.0203442	2.63413	0.00277987	3.10927	0.00328916	0.136076	1.04364e-06	0.16062	1.56035e-06		-1.19332	0.00766958	-2.37378	0.00971453			-1.19332	0.11367	-2.37378	0.109822
GSB Mg	9.90341	0.00872479	1.34781	0.00119041	1.59115	0.00140972	0.136096	1.28805e-06	0.160668	1.62452e-06
GBW07133	19.2438	0.0254928	2.61863	0.00348099	3.09095	0.00411443	0.136077	1.06958e-06	0.160622	1.24839e-06		-1.17316	0.00786016	-2.32373	0.00777223			-1.17316	0.110022	-2.32373	0.114037
GSB Mg	9.93801	0.00826892	1.35252	0.00112681	1.59669	0.00133408	0.136096	1.04776e-06	0.160664	1.49872e-06
GBW07133	19.3087	0.0239709	2.62756	0.00326811	3.1015	0.00387261	0.136082	7.53878e-07	0.160627	1.42981e-06		-1.13537	0.00553986	-2.29696	0.00890144			-1.13537	0.0848248	-2.29696	0.115297
GSB Mg	10.0028	0.0122509	1.36135	0.00167253	1.60713	0.00197392	0.136097	1.38832e-06	0.160669	1.3992e-06
GBW07133	18.8205	0.0309876	2.56082	0.00422109	3.02254	0.00499539	0.136066	8.54689e-07	0.160606	1.23508e-06		-1.20239	0.00628142	-2.37564	0.00769016			-1.20239	0.107137	-2.37564	0.103885	-1.17606	0.103913	-2.34253	0.11076
GSB Mg	10.0788	0.00987069	1.37174	0.00134642	1.61943	0.00158797	0.136082	1.30793e-06	0.160648	1.48936e-06
GSB Mg	9.4464	0.0110206	1.28551	0.00150424	1.51741	0.00178146	0.136085	1.25924e-06	0.160635	1.7728e-06
GBW07134	8.84106	0.00960161	1.20311	0.00131007	1.42009	0.00155027	0.136086	1.02432e-06	0.160639	1.70305e-06		-1.02363	0.00752697	-2.04548	0.0106018			-1.02363	0.106689	-2.04548	0.136877
GSB Mg	9.32109	0.0140808	1.26847	0.00191877	1.49734	0.00227244	0.136086	1.02428e-06	0.160641	1.62841e-06
GBW07134	8.82405	0.0077575	1.20084	0.001058	1.41753	0.00125551	0.136087	1.23358e-06	0.160643	1.75081e-06		-0.989054	0.00906462	-1.96619	0.0108988			-0.989054	0.105388	-1.96619	0.133144
GSB Mg	9.04744	0.0145526	1.23116	0.00198493	1.45319	0.00234447	0.136078	1.42438e-06	0.160619	1.5588e-06
GBW07134	8.69735	0.00787107	1.18354	0.00107561	1.39702	0.001269	0.13608	1.13092e-06	0.160626	1.46168e-06		-0.9993	0.00831064	-1.97171	0.00909986			-0.9993	0.119548	-1.97171	0.119005
GSB Mg	8.95848	0.0144565	1.21902	0.00197102	1.43881	0.0023363	0.136075	1.0842e-06	0.160608	1.99377e-06
GBW07134	8.67892	0.00970925	1.18103	0.00132735	1.39407	0.00156344	0.136081	1.57809e-06	0.160627	1.44009e-06		-1.01684	0.0115967	-2.03647	0.00896541			-1.01684	0.125847	-2.03647	0.136955	-1.00721	0.114368	-2.00496	0.131495
GSB Mg	9.21903	0.00743519	1.25456	0.00101183	1.48095	0.00120092	0.136084	1.21648e-06	0.160641	1.15217e-06
GBW07134	9.26622	0.00770308	1.26102	0.00105241	1.48854	0.00124326	0.136088	1.01884e-06	0.160641	1.4665e-06		-0.997696	0.00748663	-2.0319	0.00912907			-0.997696	0.104295	-2.0319	0.103842
GSB Mg	9.14803	0.0109822	1.24489	0.00149871	1.46949	0.00177384	0.136083	8.94219e-07	0.160635	1.68756e-06
GBW07134	9.28849	0.006282	1.26404	0.000857866	1.49218	0.00101574	0.136087	1.409e-06	0.160648	1.44868e-06		-1.01948	0.0103537	-1.99917	0.00901768			-1.01948	0.109684	-1.99917	0.123838
GSB Mg	9.21108	0.0068725	1.25351	0.000935326	1.47973	0.00110693	0.136087	1.16455e-06	0.160646	1.46112e-06
GBW07134	9.17544	0.00930628	1.2486	0.00126822	1.47389	0.00150238	0.136081	9.94003e-07	0.160634	1.62275e-06		-1.06635	0.00730449	-2.10352	0.0101022			-1.06635	0.100629	-2.10352	0.121577
GSB Mg	9.15141	0.0123619	1.24537	0.00168583	1.47006	0.00199205	0.136085	1.39204e-06	0.160638	1.63859e-06
GBW07134	9.25978	0.00603467	1.26012	0.000825728	1.48751	0.000977108	0.136085	1.17547e-06	0.160642	1.61366e-06		-1.03014	0.00863777	-2.02769	0.0100451			-1.03014	0.119749	-2.02769	0.128051	-1.02842	0.108589	-2.04057	0.119327
GSB Mg	9.17468	0.00750264	1.24855	0.00102263	1.4738	0.0012131	0.136086	1.29282e-06	0.160639	1.42186e-06
GBW07134	10.4484	0.0155044	1.42181	0.00211423	1.67831	0.00250067	0.136081	1.07006e-06	0.160631	1.66939e-06		-1.06444	0.00786339	-2.10124	0.0103927			-1.06444	0.110299	-2.10124	0.122093
GSB Mg	9.17664	0.00785672	1.24881	0.00107154	1.47411	0.00126794	0.136085	1.03736e-06	0.160639	1.43877e-06
GBW07134	10.5147	0.0116879	1.4309	0.00159634	1.68908	0.00188841	0.136086	1.19284e-06	0.16064	1.42707e-06		-1.01343	0.00876532	-2.02051	0.00888364			-1.01343	0.103902	-2.02051	0.112837
GSB Mg	9.1533	0.00920792	1.2456	0.00125446	1.47031	0.00148822	0.136082	1.15038e-06	0.160631	1.81391e-06
GBW07134	10.3222	0.012088	1.40461	0.00165087	1.65795	0.00195129	0.136082	1.3529e-06	0.160629	1.50517e-06		-1.04066	0.0099418	-2.09456	0.00937043			-1.04066	0.116721	-2.09456	0.131239
GSB Mg	9.26195	0.0080675	1.26042	0.00109978	1.48786	0.00130556	0.136086	1.23898e-06	0.160642	1.77188e-06
GBW07134	10.4599	0.0133197	1.42338	0.00181341	1.68017	0.00214645	0.136079	8.62975e-07	0.16063	1.25315e-06		-1.08553	0.00634171	-2.13006	0.00780149			-1.08553	0.0992339	-2.13006	0.120828	-1.05102	0.107539	-2.08659	0.121749
GSB Mg	9.27851	0.00431203	1.2627	0.000585737	1.49054	0.000692055	0.136088	1.35419e-06	0.160644	1.35744e-06
GBW07135	9.91328	0.0109769	1.34866	0.00149536	1.59157	0.00176785	0.136046	1.08168e-06	0.160549	1.09053e-06		-1.28498	0.00795083	-2.54158	0.00679251			-1.28498	0.113899	-2.54158	0.0969286
GSB Mg	9.2421	0.00724695	1.25762	0.000988713	1.48439	0.00116919	0.136074	1.10721e-06	0.160611	1.62128e-06
GBW07135	9.92998	0.00992516	1.3508	0.00135033	1.59401	0.00160241	0.136032	9.44611e-07	0.160525	1.97228e-06		-1.2972	0.00694401	-2.50946	0.0122865			-1.2972	0.0956542	-2.50946	0.142166
GSB Mg	9.17733	0.0176667	1.2487	0.00240879	1.47377	0.00284794	0.136063	1.26564e-06	0.160586	1.60376e-06
GBW07135	10.0263	0.00926973	1.36395	0.00126234	1.60951	0.00149547	0.136033	1.14613e-06	0.160518	1.32841e-06		-1.26951	0.0084254	-2.51545	0.00827577			-1.26951	0.112226	-2.51545	0.115953
GSB Mg	9.33734	0.0100838	1.2705	0.00137538	1.49955	0.00163019	0.136067	1.35459e-06	0.160599	1.47794e-06
GBW07135	9.96342	0.0116945	1.35531	0.00159252	1.59921	0.00188527	0.136029	1.08533e-06	0.160508	1.75662e-06		-1.30403	0.00797866	-2.60808	0.0109441			-1.30403	0.11408	-2.60808	0.127823	-1.28893	0.108965	-2.54364	0.120718
GSB Mg	9.40408	0.0104327	1.27957	0.00142006	1.51025	0.00168515	0.136065	9.51372e-07	0.160597	1.39714e-06
GBW07135	9.66795	0.00919825	1.31512	0.00125471	1.55178	0.00148958	0.136029	1.15597e-06	0.160507	1.63794e-06		-1.29417	0.00849798	-2.57395	0.0102048			-1.29417	0.0984034	-2.57395	0.119879
GSB Mg	9.42759	0.0111576	1.28276	0.00152085	1.51395	0.00180383	0.136065	1.09514e-06	0.160586	1.79885e-06
GBW07135	9.64263	0.0177179	1.31166	0.00241472	1.54776	0.00286008	0.136028	1.17412e-06	0.160514	1.7536e-06		-1.27305	0.00863144	-2.46873	0.0109249			-1.27305	0.105534	-2.46873	0.139896
GSB Mg	9.35989	0.01724	1.27348	0.00235511	1.50295	0.00278852	0.136058	1.54349e-06	0.160575	2.3152e-06
GBW07135	9.68159	0.00798856	1.31694	0.00108777	1.55393	0.00128943	0.136022	1.35347e-06	0.160492	1.20056e-06		-1.26233	0.00995044	-2.47913	0.00748047			-1.26233	0.13494	-2.47913	0.145231
GSB Mg	9.16421	0.0183751	1.24677	0.00250801	1.47127	0.00296555	0.136049	1.48696e-06	0.160546	2.28875e-06
GBW07135	9.53686	0.0132922	1.29716	0.00181402	1.53049	0.00214408	0.136016	1.36261e-06	0.160483	1.41337e-06		-1.29072	0.010018	-2.50072	0.00880702			-1.29072	0.132574	-2.50072	0.149806	-1.28007	0.117863	-2.50563	0.138703
GSB Mg	9.40038	0.00991405	1.27896	0.00134947	1.50937	0.00160111	0.136054	1.17127e-06	0.160563	1.78855e-06
GSB Mg	9.23204	0.0134144	1.25594	0.00183019	1.48211	0.00216381	0.136041	1.2221e-06	0.16054	1.72588e-06
GBW07135	9.34056	0.0162228	1.2704	0.00221118	1.49888	0.00261674	0.13601	1.16795e-06	0.16047	2.1526e-06		-1.29809	0.00858728	-2.5467	0.0134143			-1.29809	0.111122	-2.5467	0.153677
GSB Mg	9.4433	0.0156035	1.28477	0.00212552	1.51622	0.00251877	0.136051	1.30334e-06	0.160561	1.83701e-06
GBW07135	9.56253	0.00923658	1.30069	0.00125817	1.53469	0.00149208	0.136019	9.70584e-07	0.160489	1.5567e-06		-1.2913	0.00713565	-2.54503	0.00969976			-1.2913	0.106812	-2.54503	0.13409
GSB Mg	9.60853	0.00805222	1.30732	0.00109776	1.54289	0.00130245	0.136058	1.12742e-06	0.160576	1.35914e-06
GBW07135	9.57955	0.00561708	1.303	0.000764053	1.5374	0.000906287	0.13602	8.60947e-07	0.160489	1.53875e-06		-1.31442	0.00632956	-2.60327	0.00958788			-1.31442	0.093237	-2.60327	0.114328
GSB Mg	9.66272	0.00655803	1.3147	0.000893332	1.55164	0.00105766	0.136059	1.11528e-06	0.16058	1.22455e-06
GBW07135	9.50593	0.00816761	1.29295	0.00111299	1.5255	0.00131693	0.136015	1.01504e-06	0.160479	1.70853e-06		-1.3301	0.00746273	-2.61223	0.0106465			-1.3301	0.0991214	-2.61223	0.117069	-1.30848	0.102573	-2.57681	0.129791
GSB Mg	9.62981	0.0112151	1.31015	0.00152879	1.54614	0.0018114	0.136052	1.4196e-06	0.160559	1.83527e-06
GBW07136	9.88716	0.00612432	1.34542	0.000834451	1.58813	0.000985815	0.136078	1.21441e-06	0.160624	9.73713e-07		-0.840705	0.00892433	-1.66872	0.00606206			-0.840705	0.122829	-1.66872	0.115768
GSB Mg	9.64517	0.00731375	1.31226	0.000998249	1.54869	0.00118072	0.136053	1.2799e-06	0.160567	1.29917e-06
GBW07136	9.77716	0.00871994	1.33041	0.00118428	1.57039	0.00140649	0.136074	1.10379e-06	0.160618	1.6186e-06		-0.892388	0.00811167	-1.73512	0.0100773			-0.892388	0.111117	-1.73512	0.115628
GSB Mg	9.55159	0.00796028	1.29957	0.00108879	1.53368	0.00128759	0.136057	1.0587e-06	0.160568	1.61245e-06
GBW07136	9.75361	0.00669452	1.32728	0.000910707	1.56666	0.00108022	0.136082	1.42259e-06	0.160623	1.30072e-06		-0.837638	0.0104539	-1.71311	0.00809796			-0.837638	0.116585	-1.71311	0.115424
GSB Mg	9.51431	0.00618124	1.29446	0.0008455	1.52771	0.000996607	0.136054	1.2619e-06	0.160569	1.09944e-06
GBW07136	9.67749	0.00616242	1.31688	0.000835713	1.55439	0.000998168	0.136077	1.05533e-06	0.16062	1.57934e-06		-0.872435	0.00775541	-1.73207	0.00983279			-0.872435	0.108154	-1.73207	0.107204	-0.860791	0.114671	-1.71225	0.113506
GSB Mg	9.48865	0.00851252	1.291	0.00116082	1.52358	0.00137441	0.136057	1.12965e-06	0.160569	1.52644e-06
GBW07136	10.408	0.00741575	1.41632	0.00101264	1.67181	0.00119689	0.136079	1.4105e-06	0.160628	1.23342e-06		-0.8698	0.0103653	-1.7022	0.00767873			-0.8698	0.118805	-1.7022	0.109338
GSB Mg	9.51549	0.00634462	1.29465	0.00086456	1.52795	0.00102703	0.136057	1.19543e-06	0.160575	1.49592e-06
GBW07136	10.4154	0.00720398	1.41733	0.000979681	1.67303	0.00116348	0.136081	1.31181e-06	0.16063	1.35889e-06		-0.849778	0.00963991	-1.68672	0.00845976			-0.849778	0.116683	-1.68672	0.112596
GSB Mg	9.44951	0.00672809	1.28567	0.000915873	1.5173	0.00108806	0.136057	1.10223e-06	0.16057	1.26824e-06
GBW07136	10.2325	0.0107905	1.39238	0.00147129	1.64346	0.00174242	0.136078	9.90793e-07	0.160624	1.22769e-06		-0.871702	0.00728105	-1.71911	0.00764327			-0.871702	0.09744	-1.71911	0.0983392
GSB Mg	9.44502	0.00782509	1.28506	0.00106639	1.51661	0.00126558	0.136057	1.02088e-06	0.160572	1.65937e-06
GBW07136	10.3023	0.0141904	1.4019	0.00193228	1.6548	0.00229171	0.136077	7.88775e-07	0.160625	1.4053e-06		-0.889337	0.00579652	-1.73097	0.00874891			-0.889337	0.0848169	-1.73097	0.121145	-0.870154	0.104436	-1.70975	0.110355
GSB Mg	9.46403	0.00558146	1.28768	0.000759378	1.5197	0.000900292	0.136059	1.25918e-06	0.160576	1.4535e-06
GBW07136	9.31963	0.00759694	1.26822	0.00103606	1.49699	0.00122726	0.13608	1.30801e-06	0.160628	1.43855e-06		-0.871196	0.00961209	-1.72244	0.00895579			-0.871196	0.119364	-1.72244	0.113929
GSB Mg	9.42542	0.00923633	1.28241	0.00125994	1.51348	0.00149546	0.136057	1.11055e-06	0.160575	1.76775e-06
GBW07136	9.35377	0.0058841	1.27286	0.000802372	1.50252	0.000950669	0.13608	9.96554e-07	0.160632	1.29397e-06		-0.871422	0.00732332	-1.7085	0.00805552			-0.871422	0.0980991	-1.7085	0.122053
GSB Mg	9.46745	0.00857052	1.28813	0.00117104	1.52027	0.00138462	0.136059	1.39044e-06	0.16058	1.62089e-06
GBW07136	9.27875	0.00873259	1.26268	0.00119147	1.49045	0.00140946	0.136083	9.00625e-07	0.160637	1.63866e-06		-0.8678	0.0066182	-1.7149	0.010201			-0.8678	0.108915	-1.7149	0.1284
GSB Mg	9.45589	0.011095	1.2866	0.00151356	1.51848	0.00179061	0.136063	1.12097e-06	0.160586	1.57444e-06
GBW07136	9.43049	0.00690181	1.28337	0.000944483	1.51498	0.00111176	0.136088	1.21452e-06	0.160646	1.40787e-06		-0.857069	0.00892454	-1.6991	0.0087638			-0.857069	0.108654	-1.6991	0.117659	-0.866872	0.108758	-1.71123	0.12051
GSB Mg	9.52934	0.00656735	1.29662	0.000896835	1.53035	0.00106018	0.136066	1.10317e-06	0.160594	1.44873e-06
GBW07129	9.13234	0.00969222	1.24084	0.00131949	1.46266	0.00155664	0.135875	1.13756e-06	0.160163	1.94037e-06		-2.36892	0.00837213	-4.57997	0.0121149			-2.36892	0.104104	-4.57997	0.134766
GSB Mg	9.60395	0.0129906	1.3066	0.00177025	1.54187	0.0020967	0.136047	1.38695e-06	0.160546	1.60267e-06																		JDO-1-1	-1.18594	0.0645074	-2.35239	0.0757678		-1.18594	0.105939	-2.35239	0.113536
GBW07129	9.27634	0.00731716	1.26037	0.000997404	1.4856	0.00117636	0.13587	1.15932e-06	0.160149	1.44421e-06		-2.36689	0.00853257	-4.57196	0.00901787			-2.36689	0.118745	-4.57196	0.120018							JDO-1-2	-1.18047	0.0198212	-2.34027	0.0589403		-1.18047	0.110536	-2.34027	0.119949
GSB Mg	9.95015	0.00710838	1.35378	0.000971999	1.59762	0.00115114	0.136056	1.13595e-06	0.160563	1.64131e-06																		JDO-1-3	-1.20537	0.0286441	-2.36933	0.0710418		-1.20537	0.104443	-2.36933	0.126425
GBW07129	9.23622	0.00744858	1.25482	0.0010145	1.47894	0.0011999	0.135869	1.44077e-06	0.160147	1.87164e-06		-2.36226	0.0106041	-4.57434	0.011687			-2.36226	0.120558	-4.57434	0.138529	-2.36602	0.114469	-4.57542	0.131104			mean	-1.19059	0.0261664	-2.354	0.0291872	mean	-1.19059	0.106973	-2.354	0.11997
GSB Mg	10.0194	0.00780785	1.36309	0.00106549	1.60853	0.00126028	0.136044	1.13246e-06	0.160541	1.50574e-06																		GBW07127	-1.09253	0.0223116	-2.15937	0.0424754		-1.09253	0.106373	-2.15937	0.121716
GBW07129	8.61085	0.00803088	1.16987	0.00109298	1.37879	0.00129032	0.13586	8.59827e-07	0.160123	1.43492e-06		-2.36141	0.00632879	-4.61382	0.00896136			-2.36141	0.0934059	-4.61382	0.115731							GBW07127	-1.12007	0.0410052	-2.19559	0.0823191		-1.12007	0.120165	-2.19559	0.118424
GSB Mg	9.90489	0.00923231	1.34744	0.00125993	1.58993	0.00149066	0.136037	9.60699e-07	0.160529	1.63038e-06																		GBW07127	-1.10226	0.0383777	-2.21612	0.0770953		-1.10226	0.110966	-2.21612	0.103251
GBW07129	8.74757	0.00928187	1.18849	0.00126627	1.40084	0.00149313	0.135861	1.31665e-06	0.16012	1.61162e-06		-2.3217	0.0096912	-4.59412	0.0100651			-2.3217	0.107115	-4.59412	0.127567							mean	-1.10495	0.0279321	-2.19036	0.0574695	mean	-1.10495	0.112502	-2.19036	0.114464
GSB Mg	9.95722	0.0151029	1.35454	0.00205994	1.59839	0.00243978	0.136036	1.37162e-06	0.160528	1.71871e-06																		GBW07128	-1.08453	0.0260218	-2.16973	0.0188673		-1.08453	0.108426	-2.16973	0.10468
GBW07129	8.58159	0.0128528	1.16589	0.00175109	1.37404	0.00207325	0.13586	9.89543e-07	0.160116	2.17038e-06		-2.3478	0.00728355	-4.66152	0.013555			-2.3478	0.111103	-4.66152	0.154092							GBW07128	-1.09112	0.0415837	-2.13816	0.0608605		-1.09112	0.11116	-2.13816	0.133903
GSB Mg	10.0238	0.0121957	1.36367	0.00166478	1.60922	0.0019693	0.136043	1.20705e-06	0.160542	1.39313e-06																		GBW07128	-1.1074	0.0376794	-2.18529	0.0934502		-1.1074	0.104868	-2.18529	0.125296
GBW07129	8.5705	0.0111275	1.16437	0.00151564	1.37227	0.00179365	0.135858	1.10654e-06	0.160117	1.95393e-06		-2.40453	0.00814482	-4.69336	0.0122032			-2.40453	0.107577	-4.69336	0.133578	-2.35886	0.1048	-4.6407	0.132742			mean	-1.09435	0.0235459	-2.16439	0.0480278	mean	-1.09435	0.108151	-2.16439	0.121293
GSB Mg	10.0361	0.00864151	1.36538	0.00117821	1.61119	0.00139684	0.136047	1.43986e-06	0.16054	1.55501e-06																		GBW07130	-0.78745	0.0593653	-1.53604	0.0973211		-0.78745	0.107201	-1.53604	0.129334
GBW07129	9.3127	0.0204656	1.26524	0.00278636	1.49132	0.00329715	0.135863	1.44155e-06	0.160138	2.59518e-06		-2.38406	0.0106103	-4.58673	0.0162059			-2.38406	0.13386	-4.58673	0.168437							GBW07130	-0.774221	0.0741884	-1.54983	0.0961587		-0.774221	0.0967475	-1.54983	0.128783
GSB Mg	10.1066	0.00921849	1.37498	0.0012552	1.62262	0.00149018	0.136049	1.43249e-06	0.160552	1.49514e-06																		GBW07130	-0.76528	0.0413568	-1.50497	0.0861318		-0.76528	0.106691	-1.50497	0.115511
GBW07129	9.27825	0.0132803	1.2606	0.00180777	1.48578	0.00213784	0.135868	1.29488e-06	0.16014	1.52947e-06		-2.35999	0.00953049	-4.612	0.00955086			-2.35999	0.126857	-4.612	0.119007							mean	-0.77565	0.0223082	-1.53028	0.0459627	mean	-0.77565	0.103546	-1.53028	0.124543
GSB Mg	10.1133	0.0106835	1.3759	0.00145715	1.62369	0.00171827	0.136048	1.20733e-06	0.16055	1.36577e-06																		GBW07131	-0.864094	0.058065	-1.72637	0.114224		-0.864094	0.121771	-1.72637	0.131585
GBW07129	9.39864	0.00905518	1.27701	0.00123179	1.50521	0.00145855	0.135867	1.11759e-06	0.16014	1.33567e-06		-2.33102	0.00822561	-4.53666	0.00834064			-2.33102	0.108088	-4.53666	0.106296							GBW07131	-0.857247	0.0389106	-1.71622	0.0986658		-0.857247	0.112172	-1.71622	0.13451
GSB Mg	9.85831	0.0117112	1.34112	0.00159727	1.58256	0.0018864	0.13604	1.08919e-06	0.160529	1.57016e-06																		GBW07131	-0.84093	0.0441067	-1.65551	0.0612808		-0.84093	0.117897	-1.65551	0.118878
GBW07129	9.36639	0.00902952	1.27262	0.00123424	1.5	0.00145529	0.135871	1.15286e-06	0.160149	1.40595e-06		-2.32916	0.00848499	-4.52657	0.008779			-2.32916	0.104206	-4.52657	0.117257	-2.35106	0.118253	-4.56549	0.127749			mean	-0.85409	0.023801	-1.69937	0.0766372	mean	-0.85409	0.11728	-1.69937	0.128324
GSB Mg	10.1833	0.00829926	1.38549	0.00112973	1.63508	0.00133459	0.136056	9.82774e-07	0.160564	1.62113e-06																		GBW07132	-1.40337	0.0288395	-2.76726	0.093182		-1.40337	0.120391	-2.76726	0.126987
																												GBW07132	-1.4341	0.0719011	-2.81315	0.0884794		-1.4341	0.12198	-2.81315	0.125419
GSB Mg	9.44379	0.0197936	1.28481	0.00269719	1.51618	0.00319033	0.136049	1.36936e-06	0.160549	1.73866e-06																		GBW07132	-1.42503	0.0504399	-2.80301	0.0859159		-1.42503	0.109281	-2.80301	0.131962
GBW07133	9.74002	0.00881346	1.32504	0.00120313	1.56366	0.00142121	0.136041	1.29678e-06	0.16053	1.24899e-06		-1.17625	0.00953228	-2.33499	0.00778043			-1.17625	0.123967	-2.33499	0.119221							mean	-1.42084	0.0315842	-2.79447	0.0482149	mean	-1.42084	0.117217	-2.79447	0.128123
GSB Mg	9.74712	0.017276	1.32631	0.0023596	1.5654	0.00278807	0.136072	1.52861e-06	0.160603	1.87744e-06																		GBW07133	-1.17606	0.0595078	-2.34253	0.0774865		-1.17606	0.103913	-2.34253	0.11076
GBW07133	9.52599	0.0183936	1.2959	0.00251071	1.52927	0.00296495	0.136046	1.24735e-06	0.160546	1.47967e-06		-1.20264	0.00916856	-2.39005	0.00921653			-1.20264	0.129674	-2.39005	0.133103							GBW07133	-1.19098	0.0441856	-2.36172	0.0775152		-1.19098	0.123555	-2.36172	0.117482
GSB Mg	9.50875	0.0136425	1.29383	0.00185671	1.52707	0.00220017	0.136067	1.51783e-06	0.160597	1.51391e-06																		GBW07133	-1.21651	0.0357127	-2.38475	0.0273383		-1.21651	0.121408	-2.38475	0.133426
GBW07133	9.52141	0.00833943	1.29537	0.00113666	1.52875	0.00134668	0.136048	1.46755e-06	0.16055	1.55102e-06		-1.169	0.010787	-2.32227	0.00966067			-1.169	0.138774	-2.32227	0.120697							mean	-1.19452	0.0409122	-2.363	0.0422779	mean	-1.19452	0.116292	-2.363	0.120556
GSB Mg	9.35691	0.0105036	1.27315	0.00143253	1.50262	0.00169345	0.136066	8.40018e-07	0.160589	1.27071e-06																		GBW07134	-1.00721	0.0317184	-2.00496	0.0836112		-1.00721	0.114368	-2.00496	0.131495
GBW07133	9.36649	0.00981564	1.27425	0.00133836	1.50376	0.00158304	0.136044	1.30125e-06	0.160541	1.18911e-06		-1.21604	0.00956498	-2.39958	0.0074069			-1.21604	0.101805	-2.39958	0.0969069	-1.19098	0.123555	-2.36172	0.117482			GBW07134	-1.02842	0.0573343	-2.04057	0.0888232		-1.02842	0.108589	-2.04057	0.119327
GSB Mg	9.41856	0.0113851	1.2816	0.00155717	1.51266	0.00183932	0.136072	1.65692e-06	0.160605	1.63375e-06																		GBW07134	-1.05102	0.0620822	-2.08659	0.0933446		-1.05102	0.107539	-2.08659	0.121749
GBW07133	9.02637	0.0091649	1.228	0.00124966	1.4492	0.00148027	0.136045	1.29299e-06	0.160551	1.48776e-06		-1.21146	0.0095041	-2.3921	0.00926661			-1.21146	0.138136	-2.3921	0.123035							mean	-1.02888	0.0438164	-2.04404	0.0818508	mean	-1.02888	0.110165	-2.04404	0.12419
GSB Mg	9.46044	0.0124953	1.28726	0.00170491	1.51941	0.00201676	0.136069	8.63583e-07	0.160607	1.63441e-06																		GBW07135	-1.28893	0.0303163	-2.54364	0.0903337		-1.28893	0.108965	-2.54364	0.120718
GBW07133	9.01703	0.0109066	1.22672	0.00148674	1.44769	0.00175823	0.136046	1.47422e-06	0.16055	1.65859e-06		-1.19686	0.0108362	-2.36549	0.0103307			-1.19686	0.112304	-2.36549	0.129664							GBW07135	-1.28007	0.0300325	-2.50563	0.0949067		-1.28007	0.117863	-2.50563	0.138703
GSB Mg	9.42628	0.0186714	1.28263	0.00254609	1.51381	0.00301197	0.136069	1.2574e-06	0.160594	1.89678e-06																		GBW07135	-1.30848	0.0347537	-2.57681	0.0718487		-1.30848	0.102573	-2.57681	0.129791
GBW07133	8.74523	0.0169098	1.18958	0.00230622	1.40373	0.00272545	0.13604	1.2131e-06	0.160532	1.87995e-06		-1.21792	0.00891725	-2.39639	0.0117107			-1.21792	0.11484	-2.39639	0.148717							mean	-1.29249	0.029076	-2.54203	0.0712286	mean	-1.29249	0.1098	-2.54203	0.129737
GSB Mg	9.31651	0.0107198	1.26762	0.00146254	1.49605	0.00173192	0.136062	1.27465e-06	0.160582	1.6862e-06																		GBW07136	-0.860791	0.0525793	-1.71225	0.0612221		-0.860791	0.114671	-1.71225	0.113506
GBW07133	8.99598	0.0109248	1.22378	0.0014906	1.44417	0.0017673	0.136037	1.31453e-06	0.160536	1.67328e-06		-1.23981	0.00966299	-2.38502	0.0104231			-1.23981	0.120351	-2.38502	0.132286	-1.21651	0.121408	-2.38475	0.133426			GBW07136	-0.870154	0.0323665	-1.70975	0.0387329		-0.870154	0.104436	-1.70975	0.110355
GSB Mg	9.50122	0.0075999	1.29282	0.00103521	1.52589	0.00122297	0.136069	1.05143e-06	0.160599	9.30596e-07																		GBW07136	-0.866872	0.0134832	-1.71123	0.01979		-0.866872	0.108758	-1.71123	0.12051
																												mean	-0.865939	0.00950107	-1.71108	0.00251841	mean	-0.865939	0.109289	-1.71108	0.11479
GSB Mg	10.996	0.0198858	1.49621	0.00270973	1.76592	0.00320676	0.13607	1.15162e-06	0.160599	1.56636e-06																		GBW07129	-2.36602	0.00682535	-4.57542	0.00822626		-2.36602	0.114469	-4.57542	0.131104
JDO-1-1	10.8581	0.00973689	1.47723	0.00132618	1.74324	0.00157173	0.136048	1.17304e-06	0.160548	1.38196e-06		-1.15974	0.00862223	-2.32008	0.00860778			-1.15974	0.108051	-2.32008	0.116323							GBW07129	-2.35886	0.0692369	-4.6407	0.090175		-2.35886	0.1048	-4.6407	0.132742
GSB Mg	10.9374	0.013279	1.48816	0.00181213	1.75636	0.00214647	0.136062	1.22848e-06	0.160585	1.78363e-06																		GBW07129	-2.35106	0.0522875	-4.56549	0.0813244		-2.35106	0.118253	-4.56549	0.127749
JDO-1-1	10.7978	0.0174909	1.46893	0.00238478	1.73345	0.00282286	0.13604	1.08139e-06	0.160538	1.81599e-06		-1.19721	0.00794907	-2.32502	0.0113119			-1.19721	0.107576	-2.32502	0.141758							mean	-2.35865	0.0149704	-4.59387	0.0817222	mean	-2.35865	0.112507	-4.59387	0.130532
GSB Mg	11.11	0.0150615	1.51166	0.0020578	1.78405	0.00243018	0.136063	1.3034e-06	0.160579	1.40622e-06
JDO-1-1	10.9023	0.0237102	1.48315	0.00323077	1.75016	0.00382397	0.13604	1.15998e-06	0.160531	1.65911e-06		-1.20641	0.00852677	-2.35834	0.0103351			-1.20641	0.114686	-2.35834	0.121124	-1.18779	0.110105	-2.33448	0.126402
GSB Mg	11.2121	0.0121694	1.52558	0.00166182	1.80049	0.00196323	0.136065	1.07408e-06	0.160582	1.18756e-06
JDO-1-1	11.2832	0.0256658	1.53494	0.00349534	1.8113	0.00413472	0.136042	1.11184e-06	0.160532	1.68614e-06		-1.16581	0.00817274	-2.29768	0.0105035			-1.16581	0.101617	-2.29768	0.11487
GSB Mg	11.1153	0.00900994	1.51229	0.00122612	1.78468	0.00145618	0.136056	8.98986e-07	0.16056	1.4468e-06																		JDO-1	-1.18594	0.105939	-2.35239	0.113536
JDO-1-2	10.0947	0.0122552	1.37329	0.00167299	1.62054	0.00197707	0.136041	1.10782e-06	0.16053	1.53147e-06		-1.13922	0.00814326	-2.26998	0.00954009			-1.13922	0.0937858	-2.26998	0.117347							JDO-1	-1.18047	0.110536	-2.34027	0.119949
GSB Mg	11.2656	0.0221239	1.53276	0.00301924	1.80891	0.00357052	0.136057	1.47879e-06	0.160571	1.92959e-06																		JDO-1	-1.20537	0.104443	-2.36933	0.126425
JDO-1-2	10.0327	0.0132453	1.3648	0.00180611	1.61047	0.00213332	0.136036	1.24318e-06	0.160523	1.30109e-06		-1.19288	0.00913861	-2.34712	0.00810529			-1.19288	0.12699	-2.34712	0.129609	-1.16597	0.107464	-2.30493	0.120609			JDO-1	-1.18779	0.110105	-2.33448	0.126402
GSB Mg	11.3666	0.0133488	1.54653	0.00182205	1.82513	0.00215572	0.13606	1.0394e-06	0.160571	1.4336e-06																		JDO-1	-1.16597	0.107464	-2.30493	0.120609
JDO-1-2	10.0505	0.0109112	1.36725	0.00149187	1.61336	0.00176223	0.136038	1.38712e-06	0.160526	1.61166e-06		-1.19233	0.0101966	-2.34757	0.0100399			-1.19233	0.113939	-2.34757	0.120134							JDO-1	-1.19283	0.107407	-2.36076	0.107395
GSB Mg	11.4136	0.00753873	1.55294	0.00102852	1.83274	0.00120984	0.13606	8.11829e-07	0.160576	1.1502e-06																		JDO-1	-1.17209	0.103063	-2.29846	0.118222
JDO-1-2	9.94282	0.018257	1.35256	0.00248822	1.59595	0.00294221	0.136035	1.19789e-06	0.160513	1.18254e-06		-1.19035	0.00880579	-2.38268	0.00736723			-1.19035	0.0951248	-2.38268	0.091878							JDO-1	-1.20682	0.0991888	-2.37031	0.130554
GSB Mg	11.2047	0.0145412	1.52442	0.00198564	1.79899	0.00234667	0.136053	1.16002e-06	0.160558	1.3699e-06																		JDO-1	-1.20182	0.107497	-2.34566	0.12498
JDO-1-3	10.5967	0.0131252	1.44147	0.00179017	1.70088	0.00211997	0.136031	1.27181e-06	0.160511	1.42689e-06		-1.19581	0.0093494	-2.35204	0.00888965			-1.19581	0.113156	-2.35204	0.110174	-1.19283	0.107407	-2.36076	0.107395			JDO-1	-1.21118	0.108127	-2.3747	0.114141
GSB Mg	11.4927	0.0114594	1.56363	0.0015635	1.84528	0.0018521	0.136054	9.59771e-07	0.160561	1.52838e-06																		JDO-1	-1.18755	0.107334	-2.32403	0.111931
JDO-1-3	10.7537	0.0122919	1.46285	0.00167611	1.72611	0.00197766	0.136033	1.16723e-06	0.160511	1.04118e-06		-1.16844	0.00858053	-2.31687	0.00648668			-1.16844	0.0993406	-2.31687	0.103005							mean	-1.19071	0.106464	-2.34321	0.119468
GSB Mg	11.4651	0.00894908	1.55982	0.00122263	1.84068	0.00144343	0.136049	1.1833e-06	0.160547	1.2615e-06
JDO-1-3	10.6246	0.0216424	1.4452	0.00294991	1.7052	0.00348736	0.136024	1.00925e-06	0.160496	1.72625e-06		-1.18161	0.00741964	-2.3065	0.0107557			-1.18161	0.102241	-2.3065	0.119111
GSB Mg	11.2518	0.017258	1.53069	0.0023553	1.80621	0.00278865	0.13604	1.11359e-06	0.160527	1.80591e-06
JDO-1-3	10.7616	0.0190203	1.46384	0.00259412	1.72721	0.00306473	0.136025	1.19962e-06	0.160499	1.54918e-06		-1.16621	0.00881912	-2.27202	0.00965231			-1.16621	0.107607	-2.27202	0.132549	-1.17209	0.103063	-2.29846	0.118222
GSB Mg	11.5303	0.0107715	1.56866	0.00146967	1.8511	0.00173553	0.136047	1.03442e-06	0.160542	8.17309e-07
JDO-1-4	12.6609	0.0272717	1.7221	0.00371859	2.03183	0.00439765	0.136018	1.04133e-06	0.160482	1.88824e-06		-1.23174	0.00765583	-2.40286	0.0117661			-1.23174	0.0964892	-2.40286	0.114628
GSB Mg	11.5163	0.00982182	1.56673	0.00133719	1.84878	0.00158104	0.136045	9.31703e-07	0.160534	1.38528e-06
JDO-1-4	12.7425	0.0282912	1.73322	0.00386016	2.04494	0.00456126	0.13602	1.16529e-06	0.160485	1.71629e-06		-1.19945	0.008567	-2.34223	0.0106944			-1.19945	0.098084	-2.34223	0.122874
GSB Mg	11.4318	0.0222628	1.55519	0.00303629	1.83512	0.00358946	0.136042	1.06487e-06	0.160529	1.9444e-06
JDO-1-4	12.7026	0.0299197	1.72779	0.00407635	2.03849	0.00482446	0.136019	1.14907e-06	0.160479	1.96902e-06		-1.18926	0.00844787	-2.36582	0.0122697			-1.18926	0.102993	-2.36582	0.154161	-1.20682	0.0991888	-2.37031	0.130554
GSB Mg	11.5735	0.0132441	1.57446	0.00180676	1.85789	0.00213278	0.13604	1.16649e-06	0.16053	9.48286e-07
JDO-1-4	12.6977	0.0235054	1.72709	0.00320534	2.03766	0.0037973	0.136015	1.34496e-06	0.160476	2.0868e-06		-1.22713	0.00988833	-2.39352	0.0130038			-1.22713	0.117041	-2.39352	0.127704
GSB Mg	11.1612	0.0152251	1.5182	0.00207576	1.79128	0.00245578	0.136045	1.1728e-06	0.160532	1.35705e-06
JDO-1-5	11.2595	0.0163504	1.53149	0.00223094	1.80692	0.00263683	0.136018	1.07526e-06	0.160481	1.71256e-06		-1.19157	0.00790526	-2.31781	0.0106714			-1.19157	0.104602	-2.31781	0.121737
GSB Mg	11.4705	0.0107924	1.56038	0.00147004	1.84119	0.00174191	0.136035	1.15414e-06	0.160515	1.63606e-06
JDO-1-5	11.1029	0.0178557	1.51013	0.00243428	1.78165	0.00287933	0.136012	1.01043e-06	0.160468	1.54821e-06		-1.18676	0.00742893	-2.32564	0.00964813			-1.18676	0.100849	-2.32564	0.125498	-1.20182	0.107497	-2.34566	0.12498
GSB Mg	11.4649	0.0184023	1.55961	0.00250834	1.8402	0.00296577	0.136033	8.88512e-07	0.160508	1.48007e-06
GSB Mg	11.5251	0.0138532	1.5675	0.00188397	1.84917	0.00223132	0.136008	9.85787e-07	0.160449	1.40165e-06
JDO-1-3	10.4144	0.0219268	1.41613	0.00299036	1.67025	0.0035304	0.135979	1.36335e-06	0.16038	1.67856e-06		-1.21814	0.0100261	-2.41429	0.0104662			-1.21814	0.110635	-2.41429	0.121895
GSB Mg	11.0765	0.0168042	1.50642	0.00228739	1.77699	0.00270118	0.136002	1.08684e-06	0.160428	1.20849e-06
JDO-1-3	10.6777	0.0200538	1.45201	0.00273213	1.71266	0.00322635	0.135984	1.11814e-06	0.160394	1.54027e-06		-1.1957	0.00822253	-2.32739	0.00960304			-1.1957	0.102537	-2.32739	0.109132
GSB Mg	11.4641	0.0129041	1.55925	0.00175672	1.83941	0.0020791	0.136012	1.21144e-06	0.16045	1.3009e-06
JDO-1-3	10.5535	0.0233409	1.43507	0.00317963	1.69263	0.00375823	0.135985	1.18014e-06	0.160397	1.51726e-06		-1.2197	0.00867846	-2.38243	0.0094594			-1.2197	0.111208	-2.38243	0.111396	-1.21118	0.108127	-2.3747	0.114141
GSB Mg	11.5456	0.0211139	1.57029	0.00287825	1.85249	0.00340934	0.136008	1.05829e-06	0.160451	2.1304e-06
GSB Mg	11.3987	0.0168278	1.55022	0.00229284	1.82864	0.00270952	0.136	1.23081e-06	0.160426	1.2946e-06
JDO-1-4	12.9302	0.0213147	1.75825	0.00290179	2.0739	0.00343598	0.13598	9.7947e-07	0.160393	1.72464e-06		-1.19238	0.00720306	-2.2832	0.0107526			-1.19238	0.103438	-2.2832	0.120217
GSB Mg	11.5446	0.0165919	1.57011	0.00226024	1.85215	0.00266729	0.136004	1.09835e-06	0.160434	1.16673e-06
JDO-1-4	12.8617	0.0268572	1.74895	0.00365909	2.06283	0.00432335	0.135981	1.04069e-06	0.160385	1.21493e-06		-1.20424	0.00765321	-2.37479	0.00757509			-1.20424	0.0994979	-2.37479	0.0938916
GSB Mg	11.6199	0.0109159	1.58035	0.00148644	1.8643	0.00176397	0.136005	1.2485e-06	0.160439	1.6538e-06
GSB Mg	11.4063	0.0141662	1.55111	0.00193263	1.82954	0.00227802	0.135987	1.31824e-06	0.160397	1.45657e-06
JDO-1-5	11.0677	0.0204784	1.50482	0.00279082	1.77467	0.00329771	0.135965	1.25867e-06	0.160347	1.50427e-06		-1.17505	0.00925737	-2.30968	0.00938133			-1.17505	0.119874	-2.30968	0.116754
GSB Mg	11.0069	0.0169688	1.49675	0.00231067	1.7653	0.00273125	0.135982	1.2371e-06	0.16038	1.55591e-06
JDO-1-5	11.1012	0.0189032	1.50938	0.00257529	1.78011	0.00304187	0.135966	1.04557e-06	0.160353	1.40442e-06		-1.17853	0.00768991	-2.32847	0.00875833			-1.17853	0.106528	-2.32847	0.116863	-1.18755	0.107334	-2.32403	0.111931
GSB Mg	11.448	0.0156115	1.55683	0.00212921	1.83643	0.00252173	0.135991	1.10849e-06	0.160414	1.74987e-06
25/24 Raw	Error	26/24 Raw	Error	Total Beam (V)	Error	Sample Name
0.135607	1.87e-06	0.159317	1.23e-06	12.2626	0.0357	DSM3
0.135469	1.62e-06	0.158987	1.64e-06	10.3374	0.023	GSBMg		-1.00807	0.163095	-2.02562	0.115012
0.135603	1.48e-06	0.159302	1.28e-06	11.3481	0.0368	DSM3
0.135464	1.98e-06	0.158971	1.01e-06	10.3712	0.0313	GSBMg		-1.03794	0.162988	-2.05996	0.091432
0.135607	1.06e-06	0.159297	1.36e-06	11.5882	0.00491	DSM3
0.135468	2.71e-06	0.158974	4.26e-06	10.3102	0.0404	GSBMg		-1.00807	0.191908	-2.02045	0.251041
0.135604	1.48e-06	0.159295	1.13e-06	11.5891	0.0196	DSM3		-1.01803	0.172664	-2.03534	0.152495
0.135466	1.58e-06	0.15898	1.36e-06	10.5093	0.0579	GSBMg		-1.01509	0.142726	-2.0066	0.0991984
0.135604	1.14e-06	0.159304	1.29e-06	11.6062	0.0153	DSM3
0.135469	1.65e-06	0.158986	1.2e-06	9.91563	0.0598	GSBMg		-1.01323	0.132236	-1.98271	0.0988165
0.135607	1.32e-06	0.159301	1.5e-06	9.01722	0.01	DSM3
0.135466	1.49e-06	0.158986	1.33e-06	9.9245	0.0693	GSBMg		-1.05635	0.131232	-2.01028	0.112429
0.135611	1.59e-06	0.159311	1.22e-06	9.02105	0.00331	DSM3		-1.02822	0.135398	-1.99986	0.103481
0.135467	1.78e-06	0.15899	1.46e-06	9.97404	0.01	GSBMg		-1.07107	0.157342	-2.05032	0.106727
0.135613	1.9e-06	0.159322	1.57e-06	8.92449	0.0311	DSM3						-1.01803	0.172664	-2.03534	0.152495
0.135473	1.69e-06	0.158999	1.14e-06	9.93743	0.0372	GSBMg		-1.04524	0.167612	-2.02577	0.10878	-1.02822	0.135398	-1.99986	0.103481
0.135616	1.89e-06	0.159322	1.55e-06	8.8547	0.0483	DSM3						-1.05741	0.175104	-2.04994	0.115261
0.135474	2.38e-06	0.158996	1.73e-06	10.315	0.0551	GSBMg		-1.05592	0.200358	-2.07373	0.130277	-1.05493	0.169589	-2.08368	0.141447
0.135618	1.81e-06	0.15933	1.88e-06	8.96423	0.0183	DSM3		-1.05741	0.175104	-2.04994	0.115261	-1.0746	0.200704	-2.06861	0.132598
0.135475	1.59e-06	0.158995	2.44e-06	10.2185	0.0158	GSBMg		-1.05001	0.158798	-2.10706	0.172779	-1.04664	0.170692	-2.04749	0.129056
0.135617	2.19e-06	0.159332	2.1e-06	8.88339	0.0354	DSM3
0.135477	2.86e-06	0.159005	1.41e-06	10.1287	0.0758	GSBMg		-1.03195	0.237482	-2.03134	0.141798
0.135618	1.27e-06	0.159325	1.22e-06	8.99829	0.0122	DSM3
0.13547	1.14e-06	0.15899	1.53e-06	10.4511	0.0114	GSBMg		-1.08283	0.112488	-2.11265	0.109764
0.135615	2.87e-06	0.159327	1.25e-06	8.8313	0.0679	DSM3		-1.05493	0.169589	-2.08368	0.141447
0.135475	2.08e-06	0.159	2.19e-06	9.96167	0.0668	GSBMg		-1.04338	0.233607	-2.0552	0.141487
0.135618	1.99e-06	0.159327	1.43e-06	8.87589	0.0533	DSM3
0.135469	2.26e-06	0.158995	2.07e-06	9.98869	0.0548	GSBMg		-1.09389	0.198505	-2.07969	0.141143
0.135617	1.64e-06	0.159326	1.66e-06	8.9778	0.0225	DSM3
0.135468	1.99e-06	0.158995	1.21e-06	10.0085	0.0304	GSBMg		-1.08653	0.169999	-2.07092	0.115163
0.135614	1.94e-06	0.159324	2.11e-06	8.8757	0.0493	DSM3		-1.0746	0.200704	-2.06861	0.132598
