# Supplementary material for: A rapid and simple single-step method for Mg separation from carbonates for isotopic analysis by MC-ICP-MS
Source: Royal Society of Chemistry journal article supplement (doi:10.1039/d0ja00473a), 2020-12-18
Supplement: d0ja00473a2.xlsx [file d0ja00473a2.xlsx]

## Sheet: Sheet1
	Table S1. The concentrations of major element in ten Chinese carbonate powders
	GBW07127	GBW07128	GBW07129	GBW07130	GBW07131	GBW07132	GBW07133	GBW07134	GBW07135	GBW07136
Al2O3	0.17	0.22	0.15	0.18	0.29	1.13	0.29	0.18	3.03	0.1
CaO	47.89	41.95	55.49	54.08	30.93	48.16	53.83	38.08	43.76	33.07
Fe2O3(T)	0.193	0.205	0.07	0.222	0.17	0.73	0.156	0.448	1.77	0.057
K2O	0.043	0.052	0.012	0.043	0.16	0.4	0.035	0.026	0.88	0.01
MgO	6.76	11.62	0.24	1.42	20.14	1.45	0.75	14.96	1.36	18
MnO	0.009	0.009	0.03	0.004	0.012	0.089	0.011	0.027	0.041	0.027
Na2O	0.022	0.029	0.014	0.015	0.036	0.05	0.02	0.03	0.17	0.026
P2O5	0.008	0.014	0.023	0.005	0.035	0.121	0.009	0.009	0.094	0.124
SiO2	0.55	0.72	0.3	1.08	1.15	6.27	1.28	1.17	11.07	8.25
TiO2	0.011	0.022	0.007	0.007	0.013	0.048	0.029	0.009	0.43	0.003
L.O.I.	43.92	44.75	43.3	42.64	45.73	39.07	42.75	44.61	36.57	39.73
